# Supplementary material
Source: Research Square preprint supplement (doi:10.21203/rs.3.rs-10075784/v1)
Supplement: Supplementary file 1 [file 640cd60131c39662c071ff55.docx]

Supplementary Table 1. Missing-data summary and final predictor selection

| Variable | Missing, n (%) | Included in primary penalized logistic model | Included in comparator ML models | Rationale |
| --- | --- | --- | --- | --- |
| Age, years | 0 (0.0) | Yes | Yes | Core demographic predictor |
| Sex | 0 (0.0) | Yes | Yes | Core demographic predictor |
| Hemoglobin, g/dL | 0 (0.0) | Yes | Yes | Core CBC red-cell variable |
| Hematocrit, % | 0 (0.0) | Yes | Yes | Core CBC red-cell variable |
| WBC, ×10^9/L | 0 (0.0) | No | No* | Not part of prespecified core red-cell model |
| Neutrophils, % | 0 (0.0) | No | No* | Not part of prespecified core red-cell model |
| Lymphocytes, % | 0 (0.0) | No | No* | Not part of prespecified core red-cell model |
| Monocytes, % | 6 (0.5) | No | No* | Minor missingness; excluded from core model |
| Eosinophils, % | 6 (0.5) | No | No* | Minor missingness; excluded from core model |
| Basophils, % | 6 (0.5) | No | No* | Minor missingness; excluded from core model |
| RBC, ×10^12/L | 0 (0.0) | Yes | Yes | Core CBC red-cell variable |
| MCV, fL | 0 (0.0) | Yes | Yes | Core CBC red-cell variable |
| MCH, pg | 0 (0.0) | Yes | Yes | Core CBC red-cell variable |
| MCHC, g/dL | 0 (0.0) | Yes | Yes | Core CBC red-cell variable |
| RDW-SD, fL | 0 (0.0) | Yes | Yes | Core CBC red-cell variable |
| RDW-CV, % | 0 (0.0) | Yes | Yes | Core CBC red-cell variable |
| Ferritin, ng/mL | 0 (0.0) | Outcome only | Outcome only | Endpoint definition |

***In the final comparative analysis, the same prespecified core CBC predictor set was used across penalized logistic regression, random forest, and support vector machine models to permit fair comparison and preserve clinical interpretability**

Supplementary Table 2. Penalized Logistic Regression Predictors for Ferritin <30 ng/mL

| **Variable** | **Coefficient** | **Odds Ratio (e^β)** | **Interpretation** |
| --- | --- | --- | --- |
| MCV (fL) | −1.84 | 0.16 | Lower MCV strongly associated with ferritin <30 |
| RBC count (×10¹²/L) | −1.52 | 0.22 | Lower RBC count associated with iron deficiency |
| MCHC (g/dL) | −1.51 | 0.22 | Lower MCHC predictive of low ferritin |
| Hemoglobin (g/dL) | +0.88 | 2.42 | Direction likely influenced by multicollinearity with RBC indices |
| Hematocrit (%) | +0.87 | 2.38 | Likely affected by correlated CBC parameters |
| RDW SD (fL) | +0.83 | 2.29 | Higher anisocytosis associated with iron deficiency |
| Age (years) | −0.68 | 0.51 | Younger patients more likely to have ferritin <30 |
| RDW CV (%) | −0.64 | 0.53 | Direction unstable due to correlation with RDW-SD and MCV |
| Sex | +0.38 | 1.47 | Female sex associated with greater odds of deficiency |
| Neutrophil % | −0.28 | 0.76 | Weak contribution |
| WBC count | −0.23 | 0.80 | Weak contribution |
| Monocyte % | −0.14 | 0.87 | Minimal contribution |
| Basophil % | +0.08 | 1.08 | Negligible contribution |
| Eosinophil % | +0.07 | 1.08 | Negligible contribution |
| Lymphocyte % | 0.00 | 1.00 | Penalization shrunk contribution to zero |
